# Supplementary material for: Spatiotemporal Correlation Spectroscopy Reveals a Protective Effect of Peptide-Based GLP-1 Receptor Agonism against Lipotoxicity on Insulin Granule Dynamics in Primary Human β-Cells
Source: Pharmaceutics. 2021 Sep 3;13(9):1403. doi: 10.3390/pharmaceutics13091403 (PMC8464798; doi:10.3390/pharmaceutics13091403)
Supplement: Supplementary file 1 [file pharmaceutics-13-01403-s001.zip › pharmaceutics-1322575-supplementary.pdf]

# Supplementary Materials: Spatiotemporal Correlation Spectroscopy Reveals a Protective Effect of Peptide-Based GLP-1 Receptor Agonism against Lipotoxicity on Insulin Granule Dynamics in Primary Human $\beta$ -Cells

Gianmarco Ferri, Marta Tesi, Luca Pesce, Marco Bugliani, Francesca Grano, Margherita Occhipinti, Mara Suleiman, Carmela De Luca, Lorella Marselli, Piero Marchetti and Francesco Cardarelli

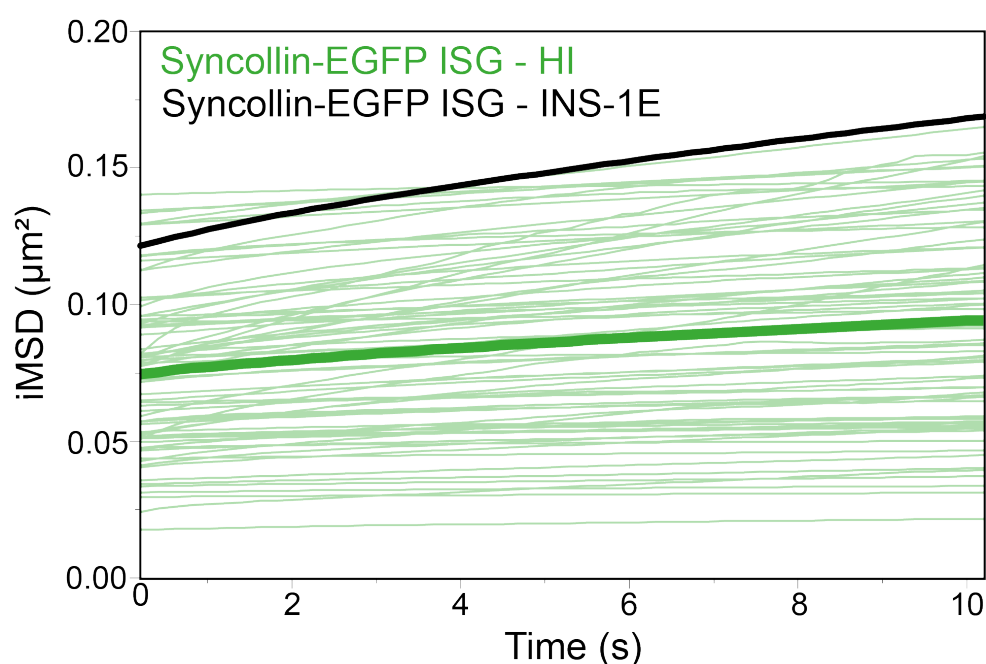

**Figure S1.** iMSD curves. iMSD curves of  $n = 123$  analyzed acquisitions of syncollin-EGFP labelled ISGs in HI (green curves) and relative average curve (bold green). In black, average iMSD curve of  $n = 48$  previously published acquisitions of syncollin-EGFP labelled ISGs in INS-1E cells.

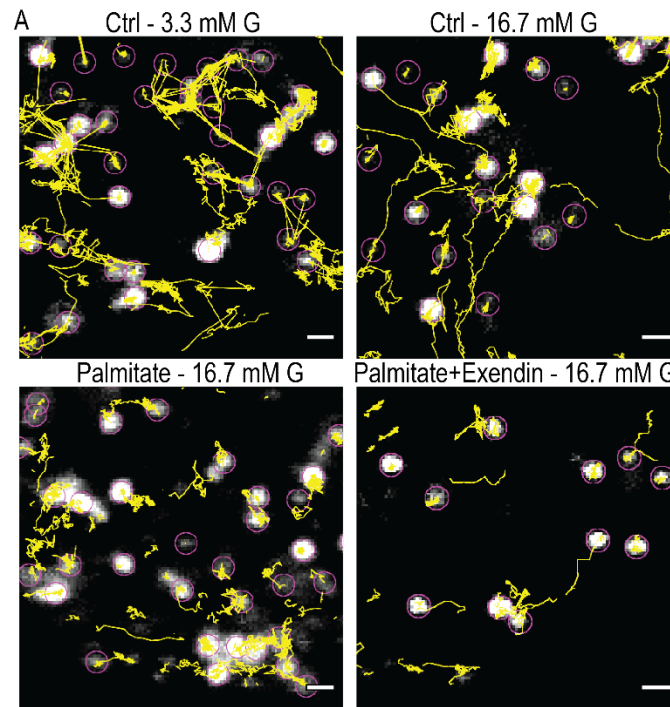

**Figure S2.** Exendin-4 effect on ISGs dynamic. Trajectories (in yellow) of ISGs motion in low glucose control medium (Ctrl – 3.3 mM G) compared to granule's motion after glucose stimulation (16.7 mM G) in Ctrl medium, in case of Palmitate 48 h exposure and in case of Palmitate+Exendin-4 48 h exposure.
